# Supplementary material for: Design of High-Relaxivity Polyelectrolyte Nanocapsules Based on Citrate Complexes of Gadolinium(III) of Unusual Composition
Source: MDPI journal article supplement (doi:10.3390/ijms222111590), 2021-10-27
Supplement: s1 [file s1]

# Design of high-relaxivity polyelectrolyte nanocapsules based on citrate complexes of gadolinium(III) of unusual composition

Evgenia Burilova <sup>1,2,\*</sup>, Alexander Solodov <sup>2</sup>, Julia Shayimova <sup>2</sup>, Julia Zhuravleva <sup>2</sup>, Darya Shurtakova <sup>2</sup>, Vladimir Evtjugin <sup>2</sup>, Elena Zhiltsova <sup>1</sup>, Lucia Zakharova <sup>1</sup>, Ruslan Kashapov <sup>1</sup> and Rustem Amirov <sup>2</sup>

<sup>1</sup> Arbuzov Institute of Organic and Physical Chemistry, FRC Kazan Scientific Center, Russian Academy of Sciences, Kazan 420088, Russia; [burilovajen07@mail.ru](mailto:burilovajen07@mail.ru) (E.B.); [zhiltsova@iopc.ru](mailto:zhiltsova@iopc.ru) (E.Z.); [luciaz@mail.ru](mailto:luciaz@mail.ru) (L.Z.); [rusl701@yandex.ru](mailto:rusl701@yandex.ru) (R.K.);

<sup>2</sup> Kazan Federal University, Kremlevskaya str. 18, Kazan, Russian Federation, 420008, Russia; [burilovajen07@mail.ru](mailto:burilovajen07@mail.ru) (E.B.); [sanya.solodiv@live.com](mailto:sanya.solodiv@live.com) (A.S.); [julia\\_shayimova@mail.ru](mailto:julia_shayimova@mail.ru) (J.S.); [yulialab6@mail.ru](mailto:yulialab6@mail.ru) (J.Z.); [darja-shurtakva@mail.ru](mailto:darja-shurtakva@mail.ru) (D.S.); [ramirov58@mail.ru](mailto:ramirov58@mail.ru) (R.A.); [vevtugyn@gmail.com](mailto:vevtugyn@gmail.com) (V.E.)

\* Correspondence: [burilovajen07@mail.ru](mailto:burilovajen07@mail.ru); Tel.: +7(843)233-71-45

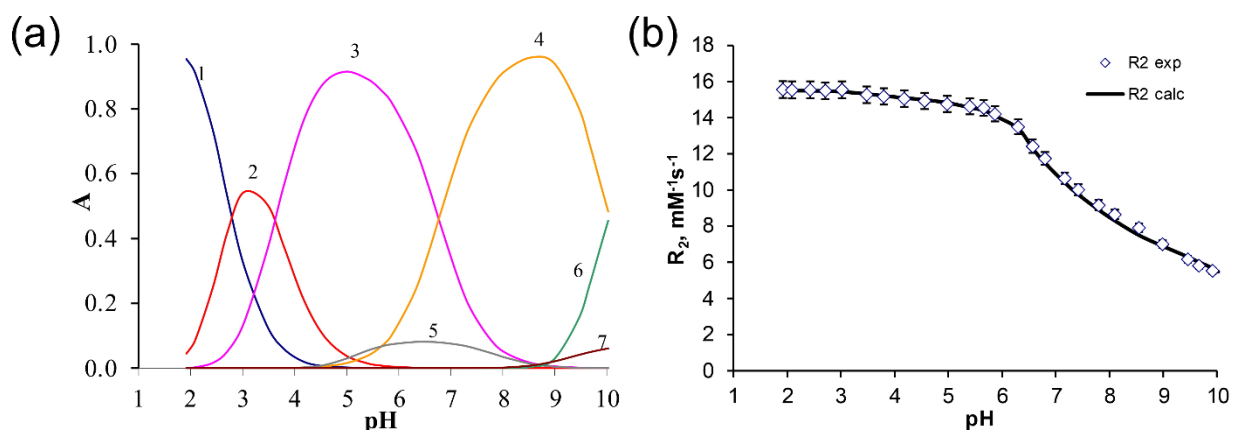

Figure S1: Diagrams of the proportional distribution of complex forms accumulating in the gadolinium(III) - citric acid system (a) and Relaxivity vs pH experimental and fitted curves (b) at a metal-ligand ratio 1 : 1 (1-Gd, 2-GdH<sub>2</sub>L, 3-GdHL, 4-GdL, 5-Gd(HL)<sub>2</sub>, 6-Gd<sub>3</sub>L<sub>3</sub>(OH)<sub>2</sub>, 7-GdL<sub>2</sub>)

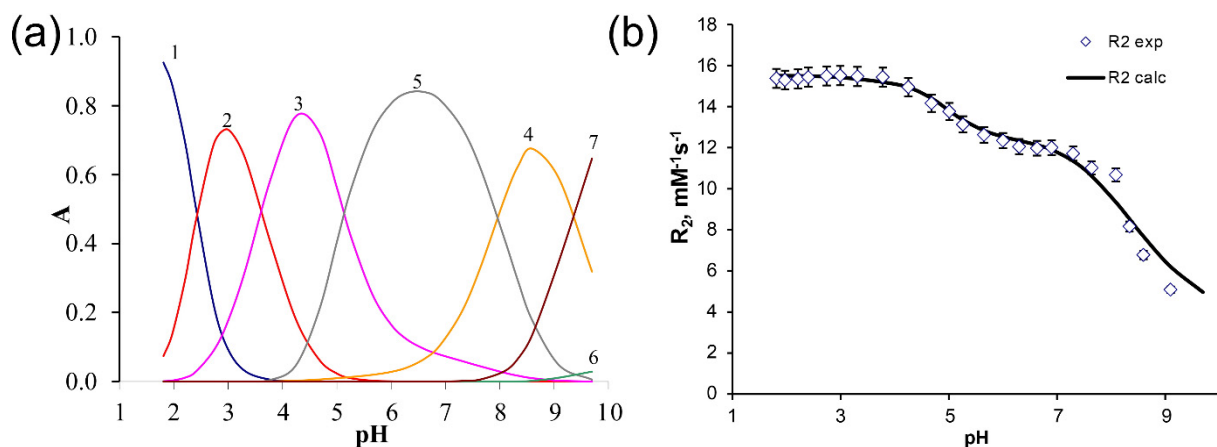

Figure S2: Diagrams of the proportional distribution of complex forms accumulating in the gadolinium(III) - citric acid system (a) and Relaxivity vs pH experimental and fitted curves (b) at a metal-ligand ratio 1 : 3; (1-Gd, 2-GdH<sub>2</sub>L, 3-GdHL, 4-GdL, 5-Gd(HL)<sub>2</sub>, 6-Gd<sub>3</sub>L<sub>3</sub>(OH)<sub>2</sub>, 7-GdL<sub>2</sub>)

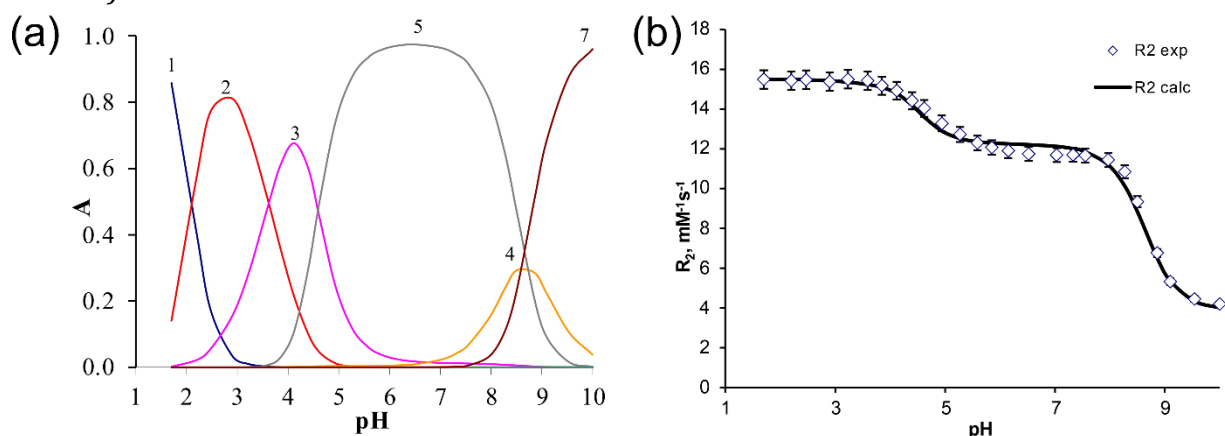

Figure S3: Diagrams of the proportional distribution of complex forms accumulating in the gadolinium(III) - citric acid system (a) and Relaxivity vs pH experimental and fitted curves (b) at a metal-ligand ratio 1 : 10; (1-Gd, 2-GdH<sub>2</sub>L, 3-GdHL, 4-GdL, 5-Gd(HL)<sub>2</sub>, 6-Gd<sub>3</sub>L<sub>3</sub>(OH)<sub>2</sub>, 7-GdL<sub>2</sub>)

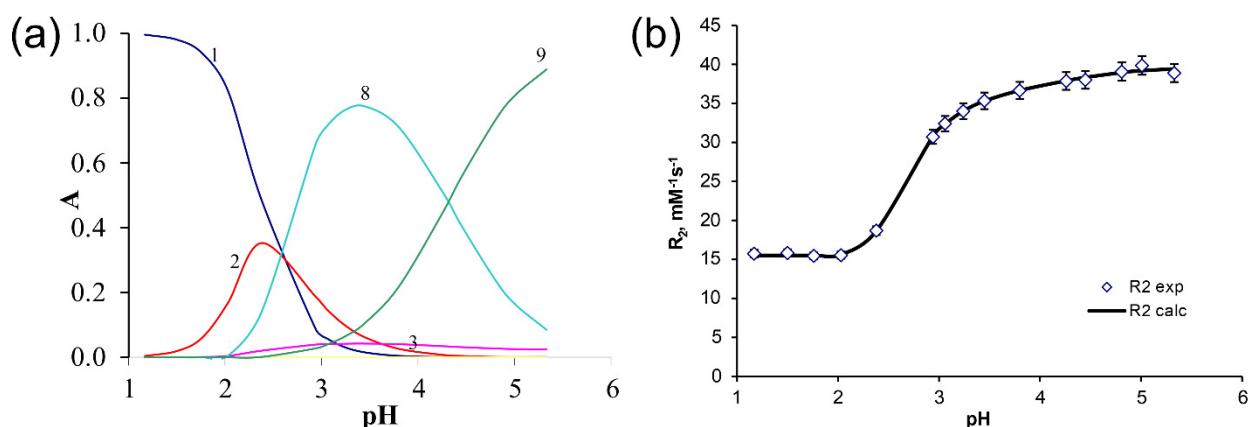

Figure S4: Diagrams of the proportional distribution of complex forms accumulating in the gadolinium(III) - citric acid - PEI0 system (a) and Relaxivity vs pH experimental and fitted curves (b) at a metal-ligand-PEI0 ratio 1 : 3 : 10. (1-Gd, 2-GdH<sub>2</sub>L, 3-GdHL, 4-GdL, 5-Gd(HL)<sub>2</sub>, 6-Gd<sub>3</sub>L<sub>3</sub>(OH)<sub>2</sub>, 7-GdL<sub>2</sub>, 8-Gd(H<sub>2</sub>L)<sub>3</sub>, 9-Gd(H<sub>2</sub>L)<sub>2</sub>HL)

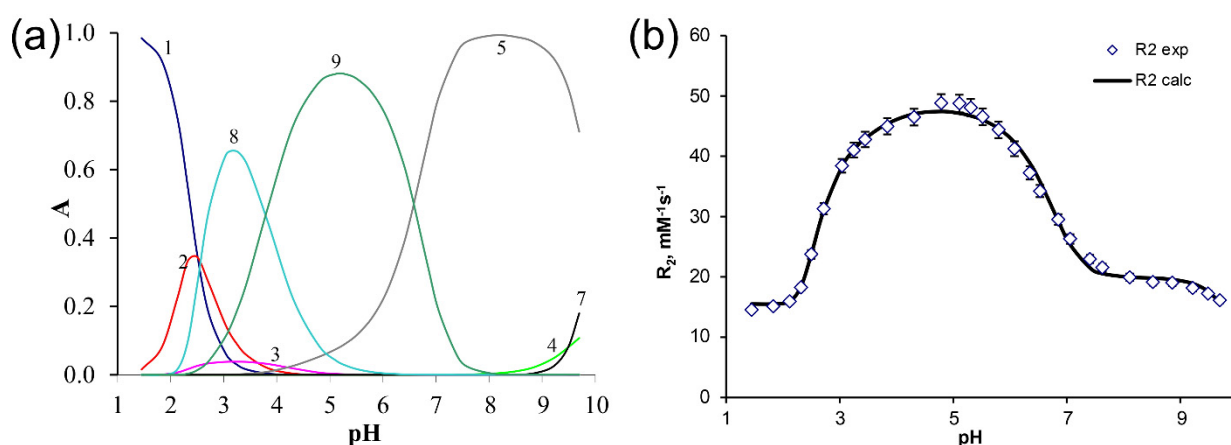

Figure S5: Diagrams of the proportional distribution of complex forms accumulating in the gadolinium(III) - citric acid - PEI0 system (a) and Relaxivity vs pH experimental and fitted curves (b) at a metal-ligand-PEI0 ratio 1 : 3 : 20 (1-Gd, 2-GdH<sub>2</sub>L, 3-GdHL, 4-GdL, 5-Gd(HL)<sub>2</sub>, 6-Gd<sub>3</sub>L<sub>3</sub>(OH)<sub>2</sub>, 7-GdL<sub>2</sub>, 8-Gd(H<sub>2</sub>L)<sub>3</sub>, 9-Gd(H<sub>2</sub>L)<sub>2</sub>HL)

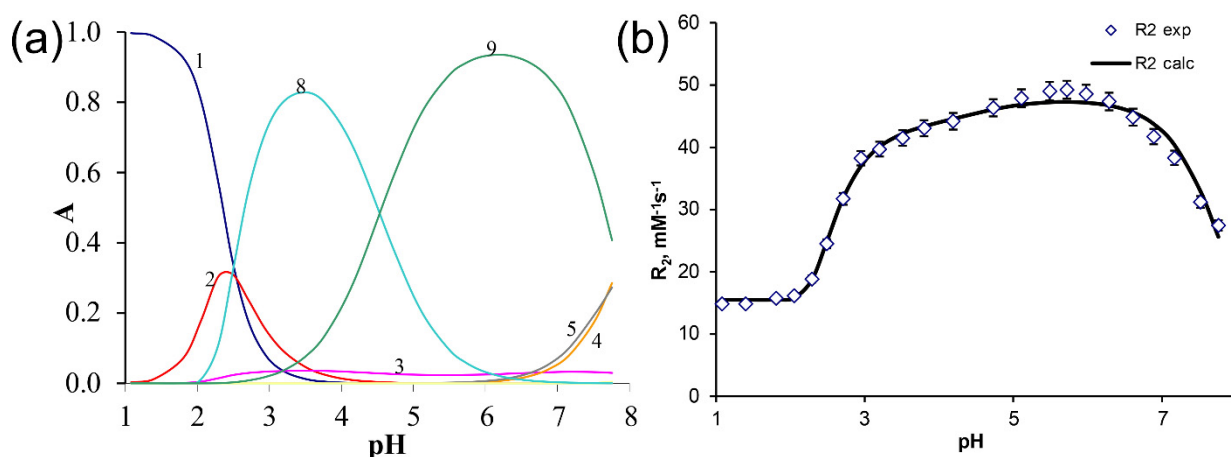

Figure S6: Diagrams of the proportional distribution of complex forms accumulating in the gadolinium(III) - citric acid - PEI0 system (a) and Relaxivity vs pH experimental and fitted curves (b) at a metal-ligand-PEI0 ratio 1 : 3 : 50 (1-Gd, 2-GdH<sub>2</sub>L, 3-GdHL, 4-GdL, 5-Gd(HL)<sub>2</sub>, 6-Gd<sub>3</sub>L<sub>3</sub>(OH)<sub>2</sub>, 7-GdL<sub>2</sub>, 8-Gd(H<sub>2</sub>L)<sub>3</sub>, 9-Gd(H<sub>2</sub>L)<sub>2</sub>HL)

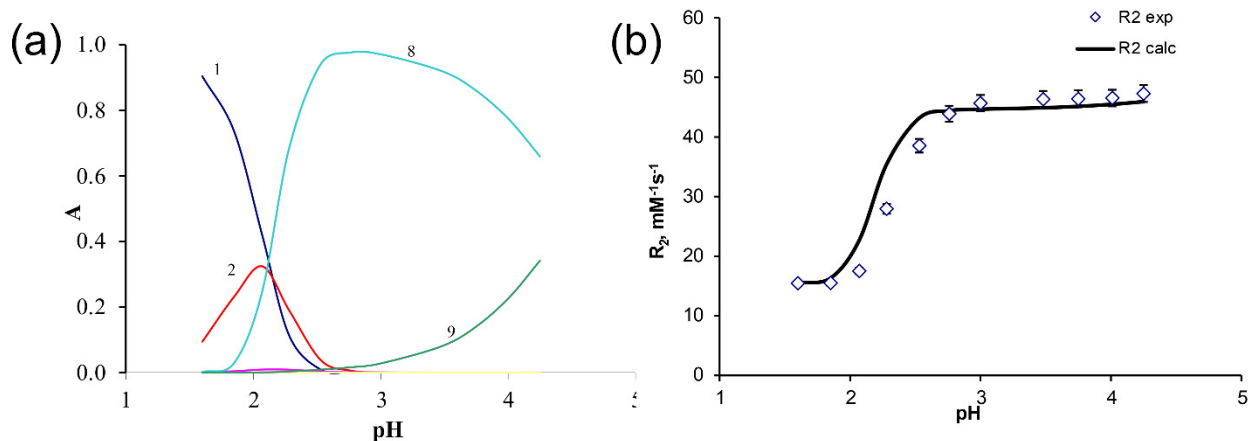

Figure S7: Diagrams of the proportional distribution of complex forms accumulating in the gadolinium(III) - citric acid - PEI0 system (a) and Relaxivity vs pH experimental and fitted curves (b) at a metal-ligand-PEI0 ratio 1 : 10 : 20; (1-Gd, 2-H<sub>4</sub>L, 3-H<sub>3</sub>L, 4-H<sub>2</sub>L, 5-HL, 6-L, 7-GdH<sub>2</sub>L, 8-GdHL, 9-GdL, 10-Gd(HL)<sub>2</sub>, 11-Gd<sub>3</sub>L<sub>3</sub>(OH)<sub>2</sub>, 12-GdL<sub>2</sub>, 13-Gd(H<sub>2</sub>L)<sub>3</sub>, 14-Gd(H<sub>2</sub>L)<sub>2</sub>HL)

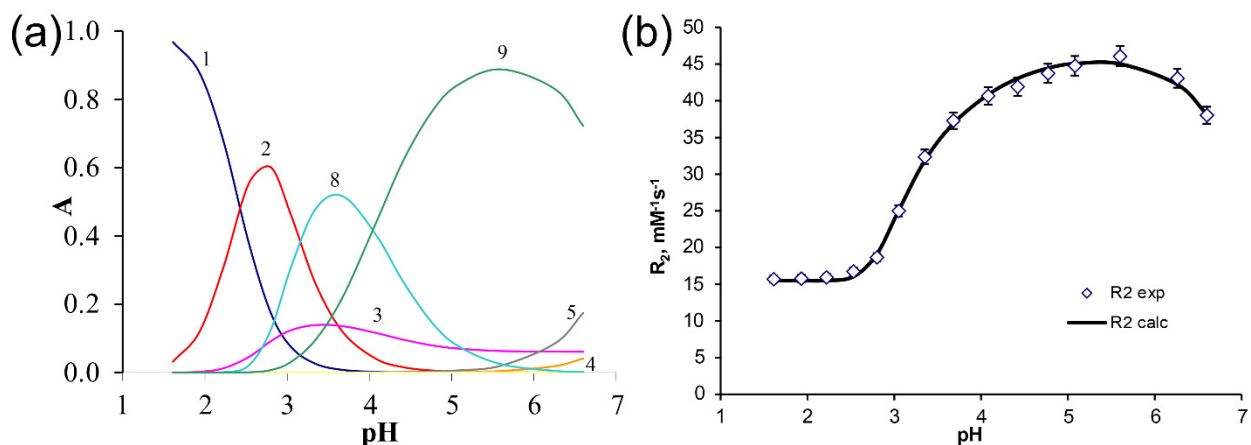

Figure S8: Diagrams of the proportional distribution of complex forms accumulating in the gadolinium(III) - citric acid - PEI0 - NaCl system (a) and Relaxivity vs pH experimental and fitted curves (b) at a metal-ligand-PEI0-NaCl ratio 1 : 3 : 20:300; (1-Gd, 2-GdH<sub>2</sub>L, 3-GdHL, 4-GdL, 5-Gd(HL)<sub>2</sub>, 6-Gd<sub>3</sub>L<sub>3</sub>(OH)<sub>2</sub>, 7-GdL<sub>2</sub>, 8-Gd(H<sub>2</sub>L)<sub>3</sub>, 9-Gd(H<sub>2</sub>L)<sub>2</sub>HL)

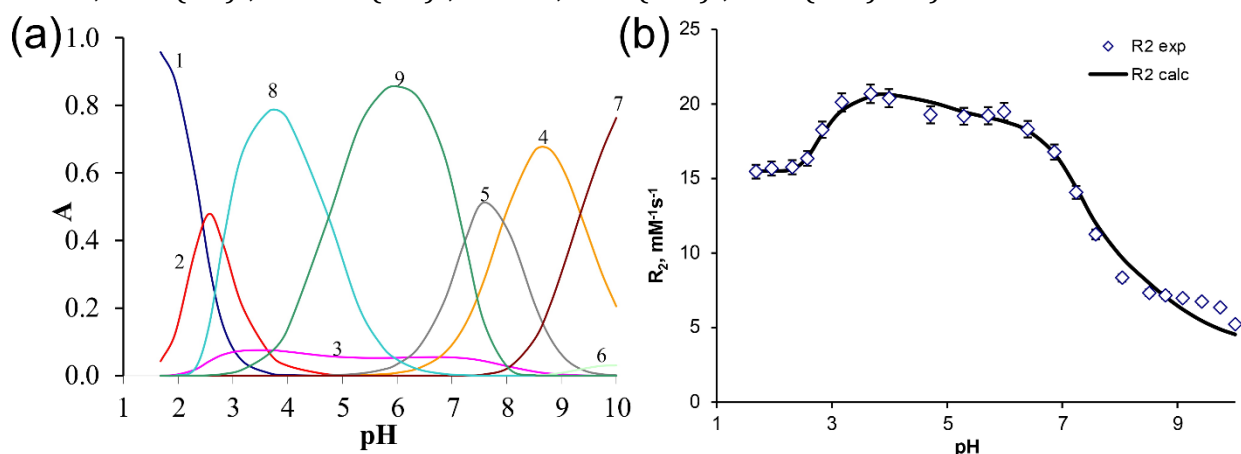

Figure S9: Diagrams of the proportional distribution of complex forms accumulating in the gadolinium(III) - citric acid - PEI3 system (a) and Relaxivity vs pH experimental and fitted curves (b) at a metal-ligand-PEI3 ratio 1 : 3 : 20; (1-Gd, 2-GdH<sub>2</sub>L, 3-GdHL, 4-GdL, 5-Gd(HL)<sub>2</sub>, 6-Gd<sub>3</sub>L<sub>3</sub>(OH)<sub>2</sub>, 7-GdL<sub>2</sub>, 8-Gd(H<sub>2</sub>L)<sub>3</sub>, 9-Gd(H<sub>2</sub>L)<sub>2</sub>HL)

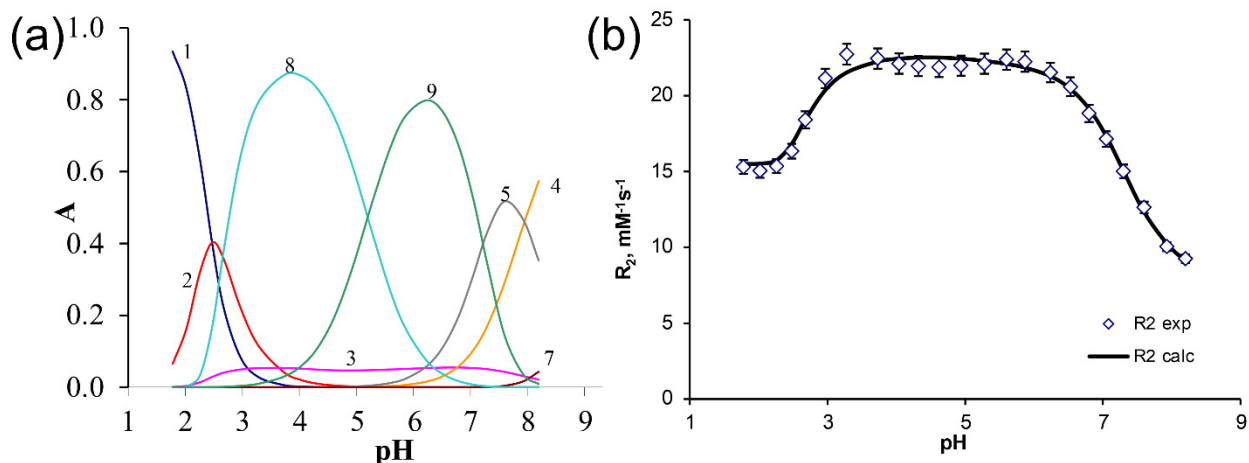

Figure S10: Diagrams of the proportional distribution of complex forms accumulating in the gadolinium(III) - citric acid - PEI2 system (a) and Relaxivity vs pH experimental and fitted curves (b) at a metal-ligand-PEI2 ratio 1 : 3 : 20; (1-Gd, 2-GdH<sub>2</sub>L, 3-GdHL, 4-GdL, 5-Gd(HL)<sub>2</sub>, 6-Gd<sub>3</sub>L<sub>3</sub>(OH)<sub>2</sub>, 7-GdL<sub>2</sub>, 8-Gd(H<sub>2</sub>L)<sub>3</sub>, 9-Gd(H<sub>2</sub>L)<sub>2</sub>HL)

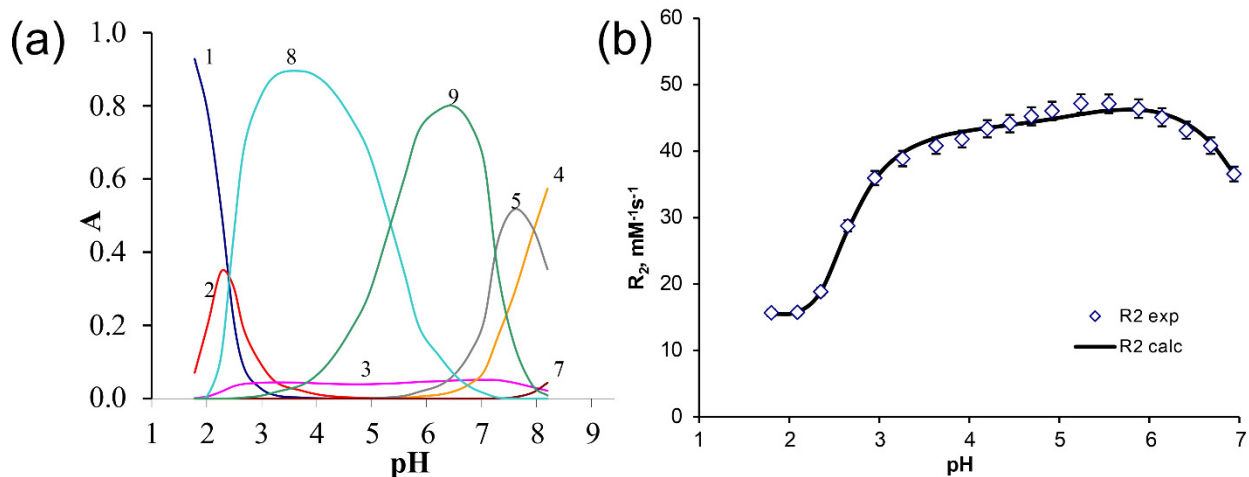

Figure S11: Diagrams of the proportional distribution of complex forms accumulating in the gadolinium(III) - citric acid - PEI1 system (a) and Relaxivity vs pH experimental and fitted curves (b) at a metal-ligand-PEI1 ratio 1 : 3 : 20; (1-Gd, 2-GdH<sub>2</sub>L, 3-GdHL, 4-GdL, 5-Gd(HL)<sub>2</sub>, 6-Gd<sub>3</sub>L<sub>3</sub>(OH)<sub>2</sub>, 7-GdL<sub>2</sub>, 8-Gd(H<sub>2</sub>L)<sub>3</sub>, 9-Gd(H<sub>2</sub>L)<sub>2</sub>HL)

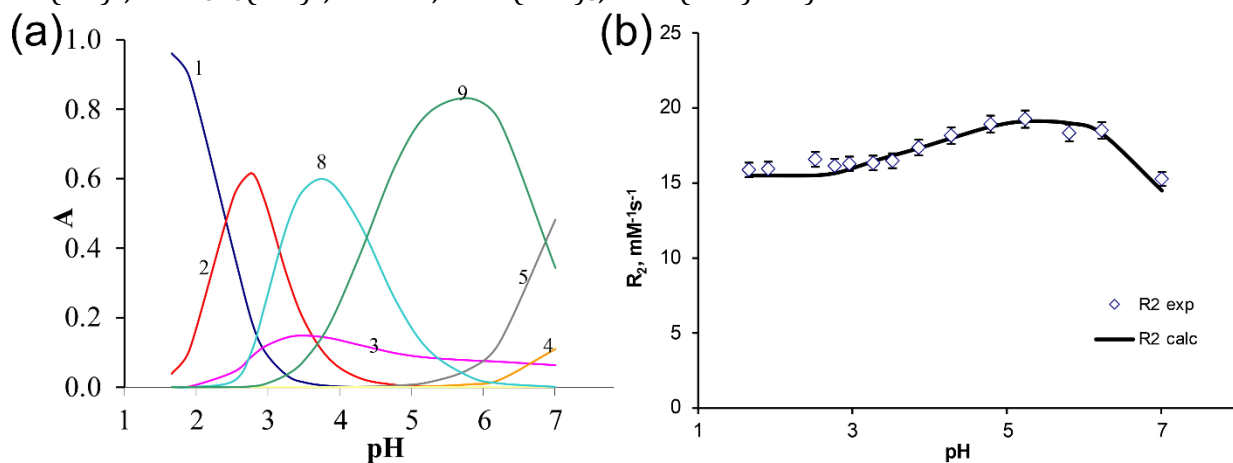

Figure S12: Diagrams of the proportional distribution of complex forms accumulating in the gadolinium(III) - citric acid - PDDC system (a) and Relaxivity vs pH experimental and fitted curves (b) at a metal-ligand-PDDC ratio 1 : 3 : 20. (1-Gd, 2-GdH<sub>2</sub>L, 3-GdHL, 4-GdL, 5-Gd(HL)<sub>2</sub>, 6-Gd<sub>3</sub>L<sub>3</sub>(OH)<sub>2</sub>, 7-GdL<sub>2</sub>, 8-Gd(H<sub>2</sub>L)<sub>3</sub>, 9-Gd(H<sub>2</sub>L)<sub>2</sub>HL)
